# Supplementary material for: Clear Conversations: A mixed methods evaluation of a verbal health literacy initiative for health service providers
Source: Research Square preprint supplement (doi:10.21203/rs.3.rs-8252432/v1), 2025-12-17
Supplement: Supplementary file 1 [file 0c9e0a855a3ad13188f8ec94.docx]

| **Warwick and Edinburgh mental wellbeing scale (SF)** | **BEFORE** | **AFTER** |  | **p-value** |
| --- | --- | --- | --- | --- |
| **Change in means intervention** | 1.84 (1.34)  N=219 | 1.36 (0.06)  N=215 | -0.48 (-0.66 to -0.30) | 0.001 |
| **Change in means control** | 3.50 (1.53)  N=76 | 3.50 (0.21)  N=79 | 0.0 (-0.34 to 0.34) | 1.00 |
