# Supplementary material for: Clear Conversations: A mixed methods evaluation of a verbal health literacy initiative for health service providers
Source: Research Square preprint supplement (doi:10.21203/rs.3.rs-8252432/v1), 2025-12-17
Supplement: Supplementary file 4 [file 725bef193618d284486f9692.docx]

| **Question** | **All service providers**  **%** | | | **Service providers in our study**  **%** | | | **Pulmonary Rehab Programme service providers**  **%** | | | **Weight Management Programme service providers**  **%** | | |
| --- | --- | --- | --- | --- | --- | --- | --- | --- | --- | --- | --- | --- |
|  | **n=110** | **n=68** | **n=23** | **n=11** | **n=11** | **n=7** | **n=5** | **n=5** | **n=3** | **n=6** | **n=6** | **n=4** |
| On a scale of 1-5 (1 Poor – 5 Excellent) how would you rate your knowledge of: | **Pre** | **Post** | **Follow Up** | **Pre** | **Post** | **Follow Up** | **Pre** | **Post** | **Follow Up** | **Pre** | **Post** | **Follow Up** |
| **The use of Teach-back**  1 Poor  2 Less than adequate  3 Adequate  4 Good  5 Excellent | 14.5  30.0  37.3  17.3  0.9 | 0  1.4  11.6  52.2  34.8 | 0  0  21.7  60.9  17.4 | 27.3  27.3  45.5  0  0 | 0  0  0  90.9  9.1 | 0  0  14.3  85.7  0 | 20  20  60  0  0 | 0  0  0  100  0 | 0  0  33.3  66.7  0 | 33.3  33.3  33.3  0  0 | 0  0  0  83.3  16.7 | 0  0  0  100  0 |
| **Chunk and Check**  1 Poor  2 Less than adequate  3 Adequate  4 Good  5 Excellent | 10.9  24.5  38.7  24.3  0.9 | 0  1.4  17.4  47.8  33.3 | 0  0  13.0  65.2  21.7 | 36.4  27.3  36.4  0  0 | 0  0  9.1  81.8  9.1 | 0  0  14.3  85.7  0 | 40  20  40  0  0 | 0  0  0  100  0 | 0  0  0  100  0 | 33.3  33.3  33.3  0  0 | 0  0  16.7  66.7  16.7 | 0  0  25  75  0 |
| **Simple language**  1 Poor  2 Less than adequate  3 Adequate  4 Good  5 Excellent | 6.4  12.7  36.4  40.9  3.6 | 0  0  10.3  55.9  33.8 | 0  0  13.0  60.9  26.1 | 9.1  9.1  45.5  36.4  0 | 0  0  0  72.7  27.3 | 0  0  0  100  0 | 0  0  20  80  0 | 0  0  0  80  20 | 0  0  0  100  0 | 16.7  16.7  66.7  0  0 | 0  0  0  66.7  33.3 | 0  0  0  100  0 |

*Use of Open Questions was not included in the staff questionnaire designed and distributed by the health literacy officer
