# Supplementary material for: Clear Conversations: A mixed methods evaluation of a verbal health literacy initiative for health service providers
Source: Research Square preprint supplement (doi:10.21203/rs.3.rs-8252432/v1), 2025-12-17
Supplement: Supplementary file 6 [file a5cf1a95429708309ab5d718.docx]

|  | **All service providers**  **%** | **Service providers in our study**  **%** | **Pulmonary Rehab Programme service providers**  **%** | **Weight Management Programme service providers**  **%** |
| --- | --- | --- | --- | --- |
|  | **n=69** | **n=11** | **n=5** | **n=6** |
| **How useful did you find the training?**  1 Not at all useful  2 Quite useful  3 Useful  4 Very useful | 2.9  2.9  26.1  68.1 | 9.1  0  27.3  63.6 | 0  0  0  100 | 16.7  0  50  33.3 |
